# Supplementary material for: Constraint Release Rouse Mechanisms in Bidisperse Linear Polymers: Investigation of the Release Time of a Short-Long Entanglement
Source: MDPI journal article supplement (doi:10.3390/polym15061569), 2023-03-21
Supplement: s1 [file s1]

# Supplementary Information: Investigation of the Release Time of a Short-Long Entanglement

Céline Hannecart <sup>1,2</sup>, Christian Clasen <sup>2</sup> and Evelyne Van Ruymbeke <sup>1,\*</sup>

<sup>1</sup> Bio- and Soft Matter, Institute of Condensed Matter and Nanosciences, Université catholique de Louvain, 1348 Louvain-la-Neuve, Belgium

<sup>2</sup> Soft Matter, Rheology and Technology, Department of Chemical Engineering, KU Leuven, 3001 Leuven, Belgium

\* Correspondence: evelyne.vanruymbeke@uclouvain.be

## 1. Viscoelastic Properties Under iso- $T_g$ Conditions

The linear viscoelastic data coming from the literature and presented at a specific temperature were horizontally shifted in order to correspond to iso- $T_g$  conditions ( $T_{ref} - T_g$ ). The validity of the shifting can be verified in Figure S1 for the monodisperse PS matrices from ref. [1]: while the data of the samples with  $M_c < 70 \text{ kg} \cdot \text{mol}^{-1}$  do not superimpose at high frequencies when they are plotted at the same reference temperature  $T_{data} = 167^\circ\text{C}$  (dashed grey lines), a good superposition is obtained under iso- $T_g$  conditions (symbols).

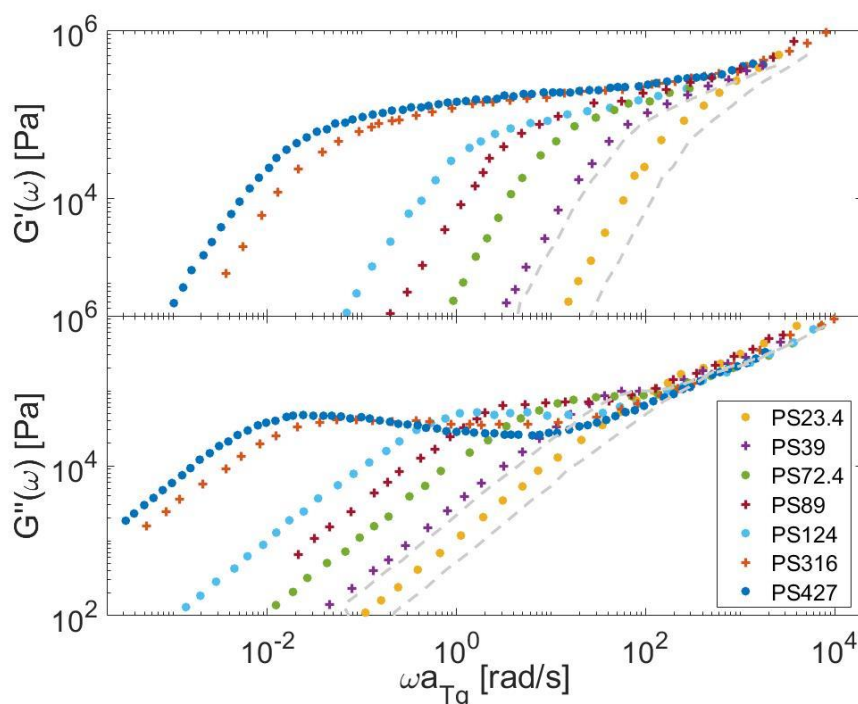

**Figure S1.** Experimental storage and loss moduli of monodisperse PS samples [1] plotted under iso- $T_g$  conditions ( $T_{ref} - T_g = 60.4$ , symbols) and at  $T_{data} = 167^\circ\text{C}$  (dashed grey lines).

Then, the experimental data of the blends PS316-39 have been shifted to iso- $T_g$ , based on the Fox-Flory equation and considering that the glass transition temperature of PS39 is around  $103.8^\circ\text{C}$ . To do so, new reference temperatures have been used for each blend:  $T_{ref} = 164.2, 164.3, 164.3$  and  $164.5^\circ\text{C}$ , leading to  $a_{Tg} = 0.725, 0.735, 0.741$ , and  $0.752$  for  $v_L = 0, 3, 5$ , and  $10\%$ , respectively.

Figure S2 presents the shifted data and shows a good superposition of the relaxation moduli at high frequencies after correction of the reference temperature. This confirms the calculated values of  $T_g$  and the corresponding shift factors.

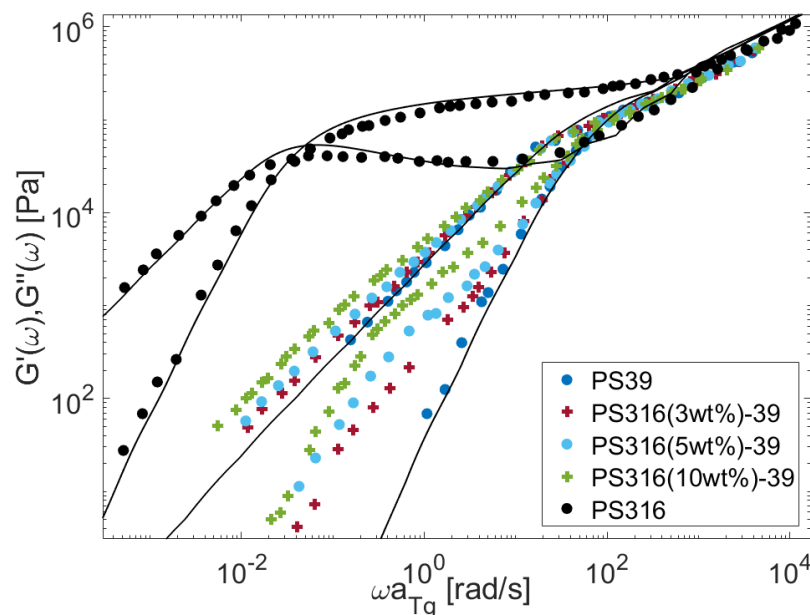

**Figure S2.** Shifted storage and loss moduli from reference [1] of PS316-39 blends (symbols), compared to the predictions obtained with the TMA model for the monodisperse components PS39 and PS316 (black curves).

## 2. Universality of the Constraint Release Rouse Process in Bidisperse Linear Blends with Self-Unentangled Long Chains

As discussed in the main paper, assuming that the CRR time of the long chains is proportional to  $Z_S^{2.5}Z_L^2$  (with  $Z_S$  and  $Z_L$  being the number of entanglement segments along the short and the long chains, respectively), this leads to a universal behavior of this process for the different chemistries tested in the present work (PS, PI, PBD, and PMMA).

Since the blends PS2810-72.4 [2] and PI626-17.6 [3] have the particularity to have both the same  $Z_S$  and  $Z_L$ , according to this universality concept, their storage modulus normalized by their different plateau modulus,  $G_N^0$ , and relaxation time of an entanglement segment,  $\tau_e$ , should completely superimpose if the weight fraction of long and short chains are the same. However, their proportion of long chains differs, with  $v_L = 0.01$  in the blend PS2810-72.4, and  $v_L = 0.005$  in the blend PI626-17.6. Accounting for this difference, it is expected, if we assume the universality of the CRR process, that the terminal regime of the normalized storage moduli  $\frac{G'}{v_L G_N^0}$  as a function of  $\omega\tau_e$  superimpose, as well as that the normalized storage moduli  $\frac{G'}{G_N^0}$  as a function of  $\omega\tau_e$  superimpose at high and intermediate frequencies (as the proportion of long chains is negligible). These two equivalences are confirmed in Figure S3.

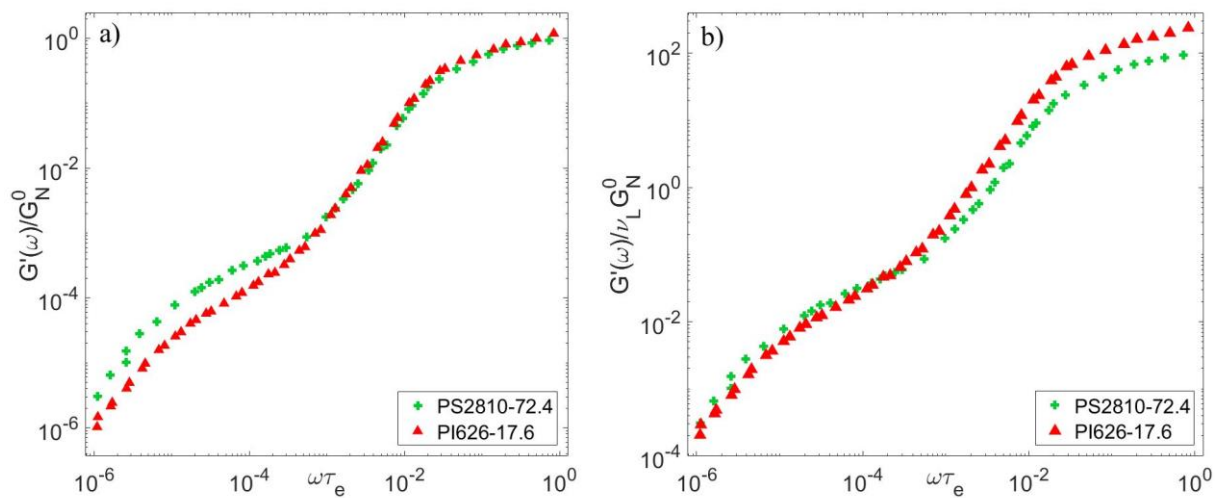

**Figure S3.** (a) Storage modulus data of PS2810-72.4 and PI626-17.6 normalized by (a)  $G_N^0$ , or (b)  $G_N^0 v_L$ , with respect to  $\omega\tau_e$ .

### 3. Non-Rouse Feature of the CR Dynamics

While the viscoelastic relaxation of a dilute long chain in a bidisperse blend is well-described by a CR-Rouse process, Figure 8 of the main paper exhibits some deviation between the normalized long chain storage modulus data and a pure Rouse-like relaxation at high frequencies, as was already noticed by Sawada et al. [3] for PI/PI dilute blends. This deviation can be explained by the non-Rouse feature of the CR dynamics, observed by Watanabe et al. [4] when investigating the dielectric relaxation of dilute dipole-inverted PI blends. Indeed, the authors showed that the eigenfunctions related to the long probe chain motion are distorted from the perfect sinusoids expected for Rouse-like chain relaxation, especially for high-order modes.

In addition to the possible effect of tension re-equilibration on the relaxation of long chains [4], the non-Rouse feature of the CR mechanism is also due to the collapse of fast CRR modes, as proposed by Sawada et al. [3]. Indeed, by noticing that local CR jumps are activated by the matrix motions, they concluded that CRR relaxation modes cannot happen on a timescale smaller than  $\tau_{d,s}$ , the final relaxation time of the matrix chains. Therefore, we take this condition into account in the model by considering that the relaxation time of a CRR relaxation mode  $p$  can never be smaller than  $\tau_{d,s}$ :

$$\tau_p = \frac{\tau_{CRR,L}}{p^2} \geq \tau_{d,s} \quad (S1)$$

Therefore:

$$G_{CRR,L}(t) = \frac{v_L \rho RT}{M_L} \sum_{p=1}^{Z_L} e^{-2t/\tau_p} \quad , \quad \tau_p = \frac{\tau_{CRR,L}}{p^2} \geq \tau_{d,s} \quad (S2)$$

Results obtained with Equations S1 and S2 are compared to the experimental data in Figure S4, which show the long chain contributions to the storage moduli of the PI blends [3]. The results obtained by considering the pure CRR process (Equation 7) in the main paper) are also shown (dashed curves). A very good agreement is found with Equation S2, which confirms the idea that CR jumps cannot happen on a timescale smaller than  $\tau_{d,s}$ , explaining, in part, the observed non-Rouse feature of the CR mechanism.

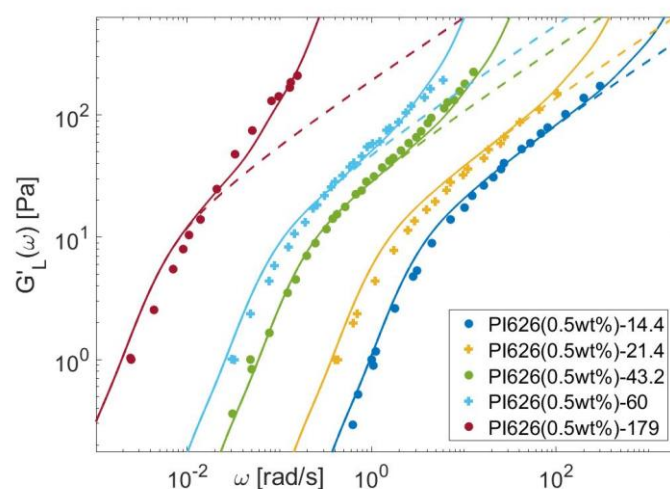

**Figure S4.** Comparison between experimental (symbols) viscoelastic storage modulus data of PI626 blends in different matrices with a modified CRR relaxation modeled by Equation S2 (continuous curves) or with a pure CRR mechanism (dashed curves).

Since this deviation happens on a timescale of the order of  $\tau_{d,S}$ , its effect on the viscoelastic relaxation modulus of the whole blend is negligible; on this timescale,  $G_{blend}$  is largely dominated by the relaxation of the short matrix chain, concealing the contribution of the long matrix chain to the viscoelastic relaxation modulus. Therefore, neglecting the deviation from a pure CRR mechanism is a reasonable approximation when modeling the viscoelastic relaxation of a dilute bidisperse blend.

## Reference

1. Watanabe, H.; Sakamoto, T.; Kotaka, T. Viscoelastic Properties of Binary Blends of Narrow Molecular Weight Distribution Polystyrenes. 2. *Macromolecules* **1985**, *18*, 1008–1015.
2. Watanabe, H.; Sakamoto, T.; Kotaka, T. Entanglements in Linear Polystyrenes. *Macromolecules* **1985**, *18*, 1436–1442.
3. Sawada, T.; Qiao, X.; Watanabe, H. Viscoelastic Relaxation of linear polyisoprenes: Examination of constraint release mechanism. *Nihon Reoroji Gakkaishi* **2006**, *35*, 1, 11–20.
4. Watanabe, H.; Urakawa, O.; Kotaka, T. Slow Dielectric Relaxation of Entangled Linear cis-Polyisoprenes with Asymmetrically Inverted Dipoles. 2. Behavior in a Short Matrix, *Macromolecules*. **1994**, *27*, 3525–3536.
